# Supplementary material for: Persistent IDH1/2 mutations in remission can predict relapse in patients with acute myeloid leukemia
Source: PubMed Central journal article supplement — Haematologica. 2018 Aug 31;104(2):305–11. doi: 10.3324/haematol.2018.191148 (PMC6355476; doi:10.3324/haematol.2018.191148), 2019-02
Supplement: 2018_191148-Disclosures_and_Contributions.pdf [file 2018_191148-Disclosures_and_Contributions.pdf]

Haematologica  
HAEMATOL/2018/191148  
Version 4

Persistent IDH1/2 mutation in remission can predict relapse in patients  
with acute myeloid leukemia

Chi Young Ok, Sanam Loghavi, Dawen Sui, Peng Wei, Rashmi  
Kanagal-Shamanna, C. Cameron Yin, Zhuang Zuo, Mark J. Routbort,  
Guilin Tang, Zhenya Tang, Jeffrey L. Jorgensen, Rajyalakshmi Luthra,  
Farhad Ravandi, Hagop M. Kantarjian, Courtney D. DiNardo, L. Jeffrey  
Medeiros, Sa A. Wang, and Keyur P. Patel

Disclosures: Authors disclose no conflict of interest.

Contributions: CYO, SL, RK, CCY, ZZ, MJR, GT, ZT, JLJ, RL, SAW and KPP interpreted patients' sample. FR, HMK and CDD provided clinical data. CYO, MJR, GT, ZT and KPP collected data. CYO, DS, PW and KPP performed data analysis. CYO wrote the manuscript. CYO, SAW and KPP supervised the study. All authors critically reviewed the manuscript agreed to submit.
